# Supplementary material for: Spiral growth mode in DMDPC organic thin film transistors by physical vapor deposition
Source: Royal Society of Chemistry journal article supplement (doi:10.1039/c6ra09711a), 2016-01-01
Supplement: c6ra09711a1.pdf [file c6ra09711a1.pdf]

## Spiral Growth Mode in DMDPC Organic Thin Film Transistors by Physical Vapor Deposition

Tianjun Liu,<sup>a,b</sup> Jiawei Wang,<sup>a,b</sup> Liang Wang,<sup>a</sup> Jing Wang,<sup>c</sup> Jingbo Lan,<sup>c</sup> Jingsong You<sup>c</sup> and  
Chao Jiang\*<sup>a</sup>

*a. CAS Key Laboratory of Standardization and Measurement for Nanotechnology, and CAS Center for Excellence in Nanoscience, National Center for Nanoscience and Technology, No. 11 Beiyitiao Zhongguancun, Beijing 100190, China*

*b. University of Chinese Academy of Sciences, No. 19A Yuquan Road, Beijing 100049, China*

*c. Key Laboratory of Green Chemistry and Technology of Ministry of Education, College of Chemistry, and State Key Laboratory of Biotherapy, West China Medical School, Sichuan University, 29 Wangjiang Road, Chengdu 610064, P. R. China.*

*Email: Jiangch@nanoctr.cn*

The DMDPC thin film morphology on bare SiO<sub>2</sub> substrate without modification was tiny island sharp with the same evaporation rate 0.2nm/min.

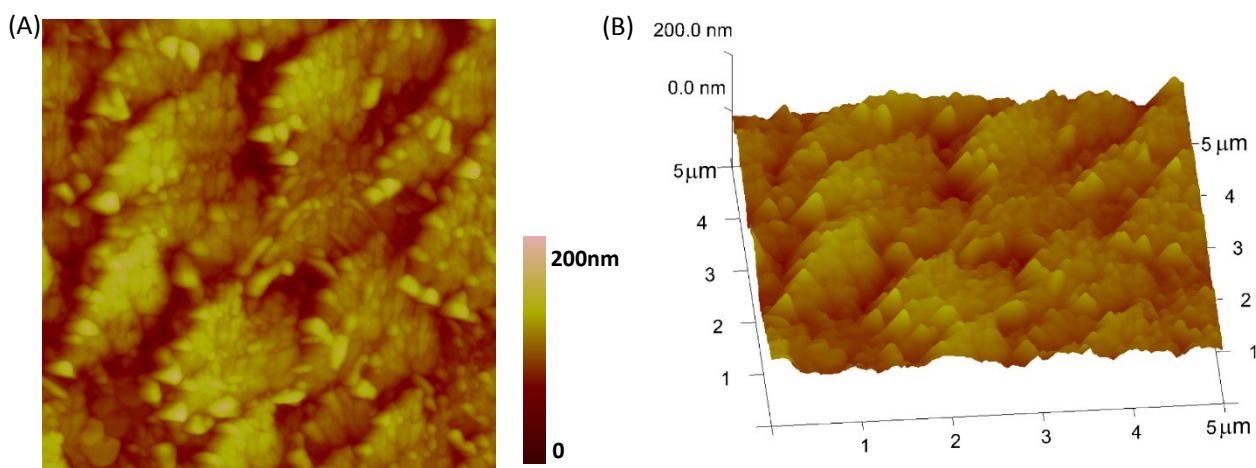

S1. (A) 5 μm × 5 μm AFM height image of DMDPC films namely thickness 45nm on bare Si/SiO<sub>2</sub>, (B) A 3D view AFM image of the DMDPC films on bare Si/SiO<sub>2</sub>.

The off current in OTFTs was usually dependent on the gate leakage current and the conductivity of the semiconductor layer. If the semiconductor layer was doped, the off current would increase. In our case, the SiO<sub>2</sub> layer of 300nm was thick enough and the gate leakage current could be neglected. In fact, we have measured the electrical characteristics of the OFETs under vacuum. With the vacuum pumped for 30 minutes, the off current decreased from 1E-7 to 2E-8. One possible explanation is that the channel between the semiconductor and the substrate was doped by the air. The electron in the HOMO level was easy to jump to the trap level, thus the density of hole in HOMO level was high under zero gate voltage.

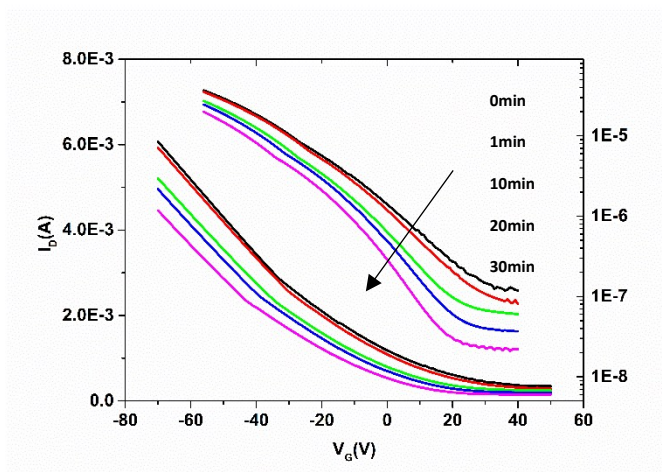

S2 The transfer curve of DMDPC OTFTs with the vacuum pumped for 30 minutes

As to the fabrication of TFTs, 45nm DMDPC films were deposited onto the bare SiO<sub>2</sub> substrate at room temperature in the deposition rate 1nm/min. Source and drain electrodes were formed by evaporating 50 nm gold films through a shadow mask with channel length  $L=50 \mu\text{m}$  and width  $W=1000 \mu\text{m}$ . Electrical characterization of devices was measured in air by a Keithley 4200 semiconductor analyzer.

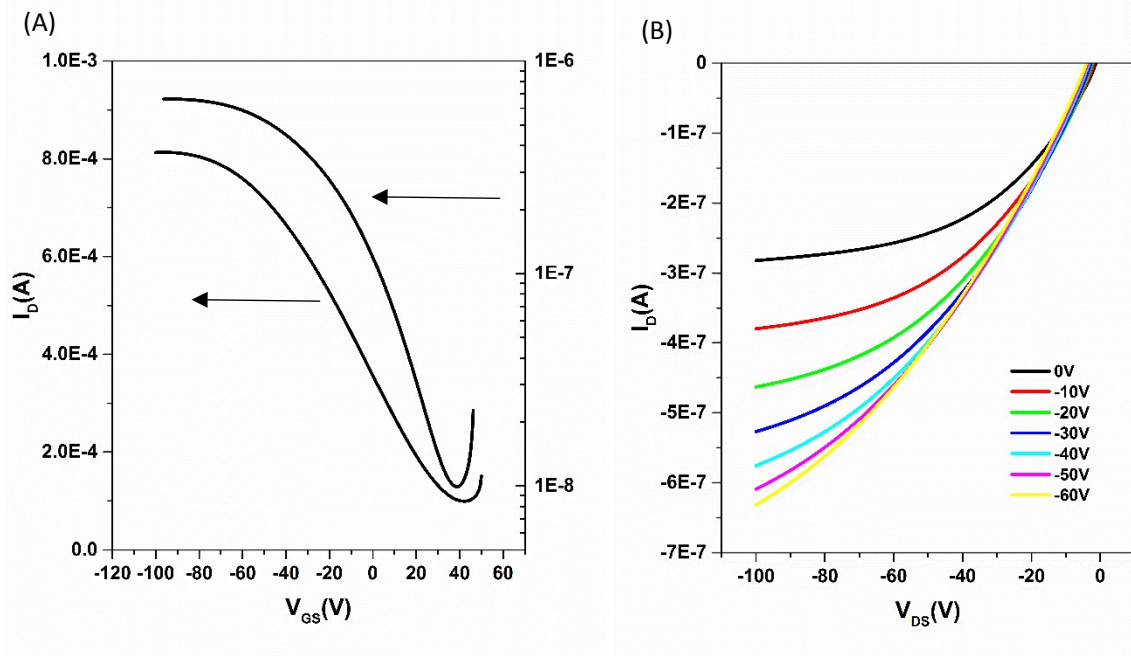

S3. Device performance of DMDPC thin film on bare SiO<sub>2</sub> substrate. (A)  $I_{DS}$ - $V_{GS}$  characteristics at  $V_{DS}=-100V$ . (B)  $I_{DS}$ - $V_{DS}$  characteristics of the device in (A). From top to bottom,  $V_G=0V$ , -10V, -20V, -30V, -40V, -50V and -60V, respectively.

The 45nm DMDPC films were deposited onto the OTS-SAM modified SiO<sub>2</sub> substrate at room temperature in the deposition rate 0.5, 1.0 and 2.4nm/min. Source and drain electrodes were formed by evaporating 50 nm gold films through a shadow mask with channel length  $L=50 \mu m$  and width  $W=1000 \mu m$ . The transfer curves and output curves were shown in the below. The mobility of DMDPC film transistors decreased from  $0.06 \text{ cm}^2V^{-1}s^{-1}$  (0.5nm/min) to  $0.008 \text{ cm}^2V^{-1}s^{-1}$  (2.4nm/min). As the deposition rate increasing, the grain size decreased (shown in S4) and the relevant mobility decreased (shown in S5), which was complementary to explain the relationships between the fabrication conditions and the device performance.

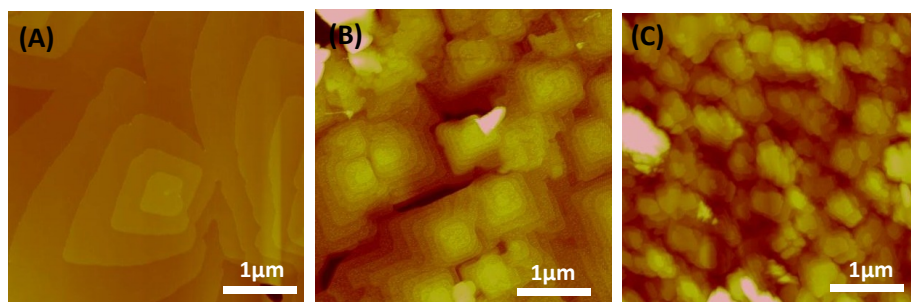

S4 (A-C)  $5\mu\text{m} \times 5\mu\text{m}$  AFM images of DMDPC films with 45 nm deposited with different deposition rate 0.5, 1.0 and 2.4nm/min, respectively.

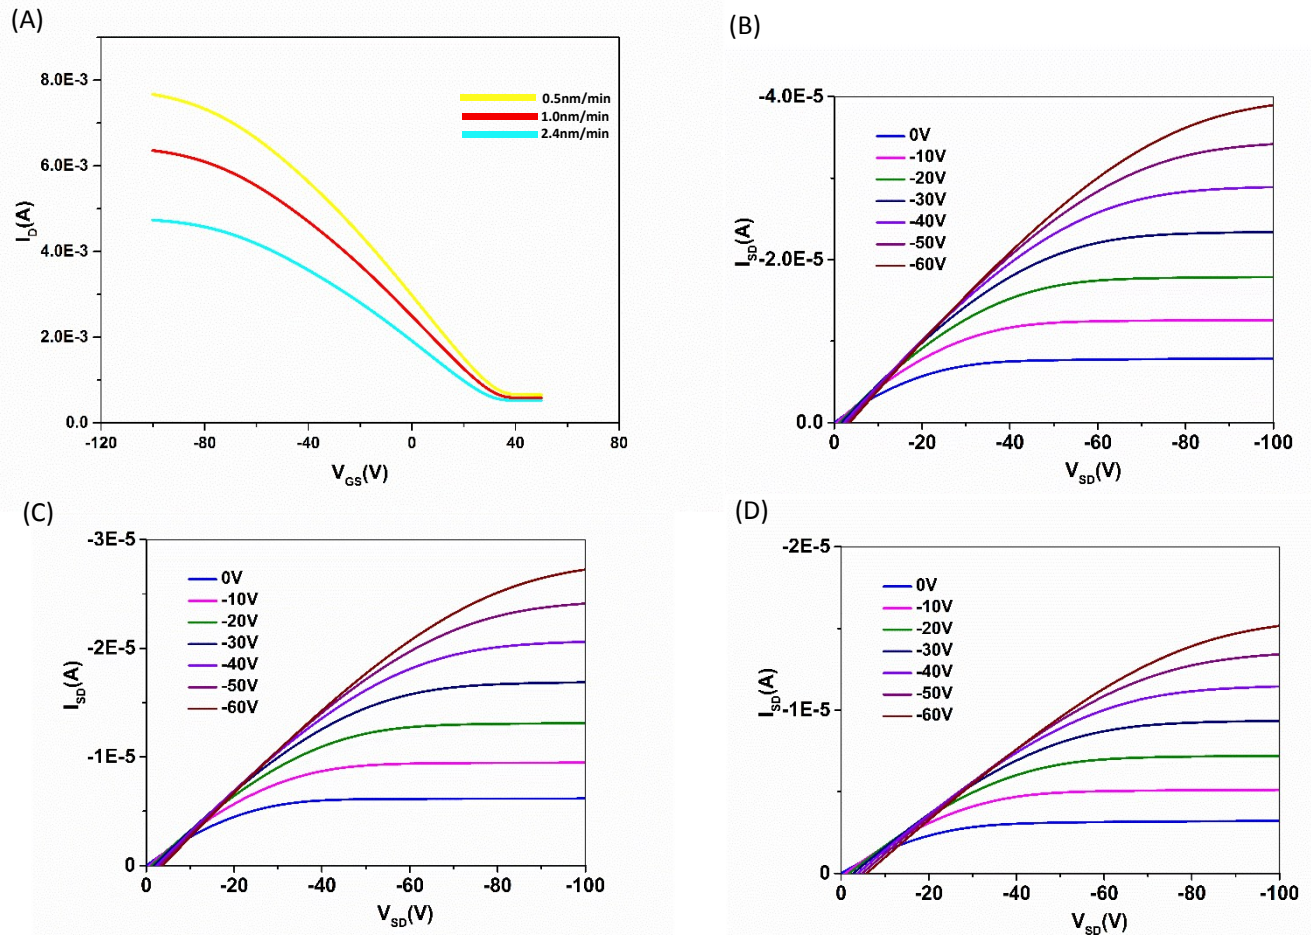

S5 (A) Transfer curve of DMDPC based TFTs under different deposition rate at  $V_{SD}=-100\text{V}$ . (B-  
D) Output characteristics of DMDPC based TFTs under different deposition rate 0.5, 1.0 and  
2.4nm/min, respectively.
